# Supplementary material
Source: PubMed Central journal article supplement (PMC9414289)
Supplement: cd-20-1631_supplementary_figure_s2_suppsf2.pdf [file cd-20-1631_supplementary_figure_s2_suppsf2.pdf]

Figure S2.

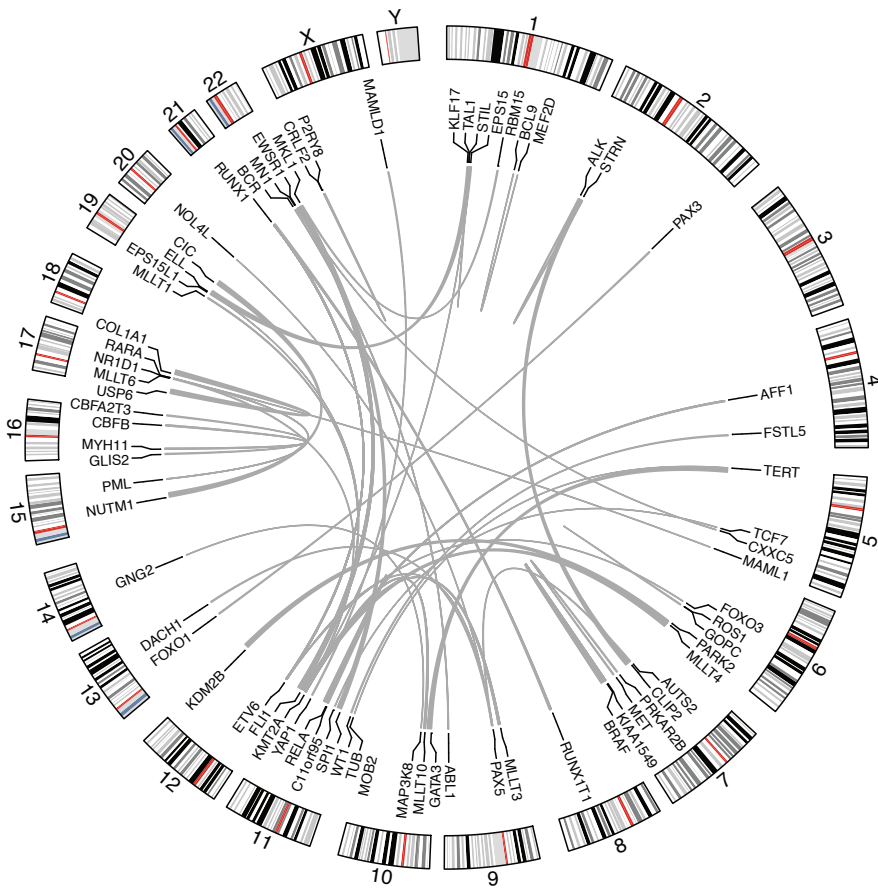

**Figure S2.** Circos plot showing expressed in frame gene fusions (grey links) detected in the G4K cohort.
